# Supplementary material
Source: Elsevier journal article supplement (https://www.sciencedirect.com/science/article/pii/S2173580820300158)
Supplement: mmc1 [file S2173580820300158:mmc1.pdf]

## APENDICES

### Apéndice A

**Tabla A.1. Principales resultados de eficacia de Alemtuzumab a los 2 años en los ensayos clínicos CARE-MS I y CARE-MS II**

|                                                                  | CARE-MS I [1]                |                                  | CARE-MS II [2]             |                                 |
|------------------------------------------------------------------|------------------------------|----------------------------------|----------------------------|---------------------------------|
|                                                                  | IFN $\beta$ -1a<br>(n=187)   | Alemtuzumab<br>12 mg<br>(n=376)  | IFN $\beta$ -1a<br>(n=202) | Alemtuzumab<br>12 mg<br>(n=426) |
| <b>Brotos</b>                                                    |                              |                                  |                            |                                 |
| Pacientes con algún evento                                       | 75 (40%)                     | 82 (22%)                         | 104 (53%)                  | 147 (35%)                       |
| Número total de eventos                                          | 122                          | 119                              | 201                        | 236                             |
| Índice anualizado de brotes (IC del 95%)                         | 0,39<br>(0,29-0,53)          | 0,18<br>(0,13-0,23)              | 0,52<br>(0,41-0,66)        | 0,26<br>(0,21-0,33)             |
| Reducción del riesgo                                             | --                           | 54,9%****                        | --                         | 49,4%****                       |
| Pacientes libres de brotes en el año 2 (IC del 95%)              | 58,7%<br>(51,1-65,5)         | 77,6%****<br>(72,9-81,6)         | 46,7%<br>(39,5-53,5)       | 65,4%****<br>(60,7-69,7)        |
| <b>Discapacidad</b>                                              |                              |                                  |                            |                                 |
| Acumulación de discapacidad sostenida <sup>a</sup>               | 20 (11%)                     | 30 (8%)                          | 40 (20%)                   | 54 (13%)                        |
| Reducción del riesgo                                             | --                           | 30%                              | --                         | 42%**                           |
| <b>Variables RM (0-2 años)</b>                                   |                              |                                  |                            |                                 |
| Cambio medio en el volumen lesional en T2 (IC del 95%)           | -6,5%<br>(-20,7-2,5)         | -9,3%<br>(-19,6- (-)0,2)         | -1,23%<br>(-11,13-11,39)   | -1,27%<br>(-12,70-7,78)         |
| Pacientes con nuevas lesiones o aumentadas en T2                 | 58%                          | 48%*                             | 68%                        | 46%****                         |
| Pacientes con lesiones captantes de gadolinio                    | 19%                          | 7%****                           | 23%                        | 9%****                          |
| Cambio medio en la fracción del parénquima cerebral (IC del 95%) | -1,488%<br>(-2,355-(-)0,567) | -0,876%****<br>(-1,470-(-)0,254) | -0,810%<br>(-1,539-0,203)  | -0,615%**<br>(-1,299-0,006)     |

IC: Intervalo de confianza. IFN: Interferón. RM: Resonancia magnética.

<sup>1</sup>Pacientes sin tratamiento modificador de la enfermedad previo (salvo corticoides en caso de recidiva). Fuente: Cohen et al., *Lancet* 2012. <sup>2</sup>Pacientes con respuesta subóptima a tratamiento modificador de la enfermedad previo. Fuente: Coles et al., *Lancet* 2012.

<sup>a</sup>Incremento de al menos 1 punto en la Escala Expandida del Estado de Discapacidad (EDSS, por sus siglas en inglés) a partir de un valor inicial de EDSS  $\geq 1,0$  (1,5 puntos de aumento para pacientes con valor inicial de EDSS de 0) que se mantuvo durante 6 meses.

\*\*\*\* $p < 0,0001$ , \*\*\* $p < 0,001$ , \*\* $p < 0,01$ , \* $p < 0,05$ .

## Apéndice B

### Metodología

1. *Constitución del grupo de trabajo*: Se estableció un grupo de trabajo multidisciplinar articulado en los siguientes subgrupos: 1) un grupo coordinador compuesto por neurólogos expertos en EM; 2) un grupo asesor integrado por un metodólogo y expertos en otras disciplinas (específicamente enfermedades infecciosas, medicina preventiva y enfermería); 3) un grupo de trabajo con amplia representación de neurólogos de toda España que atienden pacientes con EM en su práctica diaria.

2. *Determinación del alcance del documento*: durante una reunión preparatoria presencial, los miembros del grupo de coordinación junto con el grupo asesor establecieron cuáles eran los aspectos que cubriría el documento, la metodología específica que se utilizaría para llegar a un consenso, así como el plan general de trabajo y la distribución de tareas.

3. *Búsqueda bibliográfica y síntesis de la evidencia*: se llevó a cabo una búsqueda sistemática de la literatura hasta Febrero de 2017 con una actualización posterior en Diciembre de 2017, siguiendo las directrices metodológicas propuestas por la Colaboración Cochrane para la elaboración de revisiones sistemáticas (<http://handbook.cochrane.org/>). Las búsquedas se diseñaron para cubrir los siguientes aspectos específicos del tratamiento con Alemtuzumab en pacientes con EM: eficacia, efectividad y seguridad; despistaje de infecciones y vacunación; aspectos específicos de la administración (perfusión) y monitorización clínica, analítica y radiológica durante el tratamiento. Para la búsqueda se emplearon las siguientes fuentes bibliográficas: *MEDLINE*, *EMBASE*, *Cochrane Database of Systematic Reviews*, *Database of Abstracts of Reviews of Effectiveness*, *WHO International Clinical Trials Registry Platform*, *NIHR HTA database* y *Cochrane Central Register of Controlled Trials*. Adicionalmente se consultó el buscador del National Health Service Evidence Search y los sitios web de las principales agencias reguladores (FDA, EMA y AEMPS).

3.1. Las estrategias específicas de búsqueda se definen a continuación. El Cuadro B.1 muestra las sintaxis completas de búsqueda y los resultados obtenidos.

## Cuadro B.1. Sintaxis de los algoritmos de búsqueda

|                                                                                                                                                                                     |    |                                                                    |
|-------------------------------------------------------------------------------------------------------------------------------------------------------------------------------------|----|--------------------------------------------------------------------|
| <b>OVID Medline</b><br>Epub Ahead of<br>Print, In-Process<br>& Other Non-<br>Indexed Citations,<br>Ovid MEDLINE(R)<br>Daily and Ovid<br>MEDLINE(R)<br>1946 to Present<br>17/02/2017 | 1  | alemtuzumab.ti.ab. (2010)                                          |
|                                                                                                                                                                                     | 2  | "alemtuzumab".kw. (160)                                            |
|                                                                                                                                                                                     | 3  | "CD52".kw. (17)                                                    |
|                                                                                                                                                                                     | 4  | "alemtuzumab".nm. (1679)                                           |
|                                                                                                                                                                                     | 5  | "CD52 antigen".nm. (399)                                           |
|                                                                                                                                                                                     | 6  | "CD52".nm. (399)                                                   |
|                                                                                                                                                                                     | 7  | (CD52 adj5 antibody*).ti.ab. (380)                                 |
|                                                                                                                                                                                     | 8  | (anti CD52 adj5 antibody*).ti.ab. (192)                            |
|                                                                                                                                                                                     | 9  | (CDw52 adj5 antibody*).ti.ab. (10)                                 |
|                                                                                                                                                                                     | 10 | (anti CDw52 adj5 antibody*).ti.ab. (2)                             |
|                                                                                                                                                                                     | 11 | Lemtrada.ti.ab. (5)                                                |
|                                                                                                                                                                                     | 12 | Campath.ti.ab. (771)                                               |
|                                                                                                                                                                                     | 13 | 1 or 2 or 3 or 4 or 5 or 6 or 7 or 8 or 9 or 10 or 11 or 12 (3019) |
|                                                                                                                                                                                     | 14 | exp Multiple Sclerosis/ (49942)                                    |
|                                                                                                                                                                                     | 15 | multiple sclerosis.ti.ab. (60481)                                  |
|                                                                                                                                                                                     | 16 | 14 or 15 (68073)                                                   |
|                                                                                                                                                                                     | 17 | 13 and 16 (352)                                                    |
|                                                                                                                                                                                     | 18 | limit 17 to systematic reviews (20)                                |
|                                                                                                                                                                                     | 19 | 17 not 18 (332)                                                    |
|                                                                                                                                                                                     | 20 | randomized controlled trial.pt. (450385)                           |
|                                                                                                                                                                                     | 21 | controlled clinical trial.pt. (92108)                              |
|                                                                                                                                                                                     | 22 | randomized.ab. (390243)                                            |
|                                                                                                                                                                                     | 23 | placebo.ab. (184121)                                               |
|                                                                                                                                                                                     | 24 | randomly.ab. (271850)                                              |
|                                                                                                                                                                                     | 25 | clinical trials as topic.sh. (182061)                              |
|                                                                                                                                                                                     | 26 | trial.ti. (175409)                                                 |
|                                                                                                                                                                                     | 27 | 20 or 21 or 22 or 23 or 24 or 25 or 26 (1103924)                   |
|                                                                                                                                                                                     | 28 | exp animals/ not humans.sh. (4325777)                              |
|                                                                                                                                                                                     | 29 | 27 not 28 (1018812)                                                |
|                                                                                                                                                                                     | 30 | 19 and 29 (75)                                                     |
|                                                                                                                                                                                     | 31 | 17 not (18 or 30) (257)                                            |
|                                                                                                                                                                                     | 32 | exp Cohort Studies/ (1624423)                                      |
|                                                                                                                                                                                     | 33 | exp Follow-Up Studies/ (569007)                                    |
|                                                                                                                                                                                     | 34 | exp Treatment Outcome/ (812037)                                    |
|                                                                                                                                                                                     | 35 | observational study.pt. (31214)                                    |
|                                                                                                                                                                                     | 36 | observational.ti.ab. (117153)                                      |
|                                                                                                                                                                                     | 37 | cohort*.ti.ab. (403518)                                            |
|                                                                                                                                                                                     | 38 | follow up.ti.ab. (774336)                                          |
|                                                                                                                                                                                     | 39 | prospective*.ti.ab. (560542)                                       |
|                                                                                                                                                                                     | 40 | 32 or 33 or 34 or 35 or 36 or 37 or 38 or 39 (2789632)             |
|                                                                                                                                                                                     | 41 | 31 and 40 (63)                                                     |
|                                                                                                                                                                                     | 42 | 17 not (18 or 30 or 41) (194)                                      |
|                                                                                                                                                                                     | 43 | adverse effects.hw. (136)                                          |
|                                                                                                                                                                                     | 44 | toxicity.hw. (16396)                                               |
|                                                                                                                                                                                     | 45 | (side adj3 effect*).ti.ab. (210903)                                |
|                                                                                                                                                                                     | 46 | (safety or safe*).ti.ab. (667620)                                  |
|                                                                                                                                                                                     | 47 | (adverse adj3 effect*).ti.ab. (145118)                             |
|                                                                                                                                                                                     | 48 | life-threatening*.ti.ab. (67809)                                   |
|                                                                                                                                                                                     | 49 | infection*.ti.ab. (1149641)                                        |
|                                                                                                                                                                                     | 50 | malignan*.ti.ab. (482880)                                          |
|                                                                                                                                                                                     | 51 | (autoimmune adj3 disease*).ti.ab. (60802)                          |
|                                                                                                                                                                                     | 52 | risk management*.ti.ab. (9021)                                     |
|                                                                                                                                                                                     | 53 | 43 or 44 or 45 or 46 or 47 or 48 or 49 or 50 or 51 or 52 (2562701) |
|                                                                                                                                                                                     | 54 | 42 and 53 (100)                                                    |
|                                                                                                                                                                                     | 55 | 17 not (18 or 30 or 41 or 54) (94)                                 |

|                                                               |                                                                                                                                                                                                                                                                                                                                                                                                                                                                                                                                                                                                                                                                                                                                                                                                                                                                                                                                                                                                                                                                                                                                                                                                                                                                                                                                                                                                                                                                                                                                                                                                                                                                                                                                                                                                                                 |
|---------------------------------------------------------------|---------------------------------------------------------------------------------------------------------------------------------------------------------------------------------------------------------------------------------------------------------------------------------------------------------------------------------------------------------------------------------------------------------------------------------------------------------------------------------------------------------------------------------------------------------------------------------------------------------------------------------------------------------------------------------------------------------------------------------------------------------------------------------------------------------------------------------------------------------------------------------------------------------------------------------------------------------------------------------------------------------------------------------------------------------------------------------------------------------------------------------------------------------------------------------------------------------------------------------------------------------------------------------------------------------------------------------------------------------------------------------------------------------------------------------------------------------------------------------------------------------------------------------------------------------------------------------------------------------------------------------------------------------------------------------------------------------------------------------------------------------------------------------------------------------------------------------|
| <b>OVID Embase</b><br><1980 to 2017<br>Week 08><br>20/02/2017 | 1 exp alemtuzumab/ (13083)<br>2 alemtuzumab.ti,ab. (4589)<br>3 (CD52 adj5 antibody*).ti,ab. (646)<br>4 (anti CD52 adj5 antibody*).ti,ab. (338)<br>5 (CDw52 adj5 antibody*).ti,ab. (11)<br>6 (anti CDw52 adj5 antibody*).ti,ab. (2)<br>7 Lemtrada.ti,ab. (18)<br>8 Campath.ti,ab. (1272)<br>9 1 or 2 or 3 or 4 or 5 or 6 or 7 or 8 (13440)<br>10 exp multiple sclerosis/ (106396)<br>11 multiple sclerosis.ti,ab. (88786)<br>12 10 or 11 (111283)<br>13 9 and 12 (1861)<br>14 conference.so. (2500969)<br>15 13 and 14 (401)<br>16 13 not 15 (1460)<br>17 limit 16 to "systematic review" (34)<br>18 13 not (15 or 17) (1426)<br>19 random.tw. or placebo.mp. or double-blind.tw. (1409397)<br>20 18 and 19 (348)<br>21 13 not (15 or 17 or 20) (1078)<br>22 Cohort Studies/ (153909)<br>23 Follow-Up Studies/ (800343)<br>24 exp treatment outcome/ (1248567)<br>25 observational.ti,ab. (175501)<br>26 cohort*.ti,ab. (644041)<br>27 prospective*.ti,ab. (807721)<br>28 follow up.ti,ab. (1136418)<br>29 22 or 23 or 24 or 25 or 26 or 27 or 28 (3344129)<br>30 21 and 29 (237)<br>31 13 not (15 or 17 or 20 or 30) (841)<br>32 exp side effect/ (519716)<br>33 exp adverse drug reaction/ (496873)<br>34 ae.fs. (1198689)<br>35 co.fs. (1692004)<br>36 it.fs. (154826)<br>37 si.fs. (796584)<br>38 to.fs. (500768)<br>39 (side adj3 effect*).ti,ab. (294900)<br>40 (safety or safe*).ti,ab. (954860)<br>41 (adverse adj3 effect*).ti,ab. (193011)<br>42 life-threaten*.ti,ab. (93801)<br>43 infection*.ti,ab. (1424130)<br>44 malignan*.ti,ab. (641037)<br>45 (autoimmune adj3 disease*).ti,ab. (85760)<br>46 risk management*.ti,ab. (12610)<br>47 32 or 33 or 34 or 35 or 36 or 37 or 38 or 39 or 40 or 41 or 42 or 43 or 44 or 45<br>or 46 (6002565)<br>48 31 and 47 (525)<br>49 13 not (15 or 17 or 20 or 30 or 48) (316) |
| <b>The Cochrane Library</b><br>21/02/2017                     | #1 alemtuzumab:ti,ab,kw 369<br>#2 CD52:ti,ab,kw 42<br>#3 CDw52:ti,ab,kw 0<br>#4 Lemtrada:ti,ab,kw 0<br>#5 Campath:ti,ab,kw 69<br>#6 #1 or #2 or #3 or #4 or #5 403<br>#7 MeSH descriptor: [Multiple Sclerosis] explode all trees 2265                                                                                                                                                                                                                                                                                                                                                                                                                                                                                                                                                                                                                                                                                                                                                                                                                                                                                                                                                                                                                                                                                                                                                                                                                                                                                                                                                                                                                                                                                                                                                                                           |

|                                                                             |                                                                                                                                                                                                                                                                                                                                                                                                                                                                                                                       |
|-----------------------------------------------------------------------------|-----------------------------------------------------------------------------------------------------------------------------------------------------------------------------------------------------------------------------------------------------------------------------------------------------------------------------------------------------------------------------------------------------------------------------------------------------------------------------------------------------------------------|
|                                                                             | #8      multiple sclerosis:ti,ab,kw    5895<br>#9      #7 or #8                            5895<br>#10     #6 and #9                                125<br><br>Cochrane Database of Systematic Reviews : Issue 2/12, February 2017    6 hits<br>Database of Abstracts of Reviews of Effect : Issue 2 of 4, April 2015        0 hits<br>NIHR HTA database: Issue 4/4, October 2016                                        3 hits<br>Cochrane Central Register of Controlled Trials : Issue 1/12, January 2017 116 hits |
| <b>WHO<br/>International<br/>Clinical Trials<br/>Registry</b><br>21/02/2017 | (multiple sclerosis) in Condition<br>AND<br>(alemtuzumab OR Lemtrada OR Campath) in Intervention                                        12 hits                                                                                                                                                                                                                                                                                                                                                                       |
| <b>NHS Evidence<br/>Search</b><br>21/02/2017                                | <a href="https://www.evidence.nhs.uk/Search?q=alemtuzumab+AND+multiple+sclerosis#">https://www.evidence.nhs.uk/Search?q=alemtuzumab+AND+multiple+sclerosis#</a><br>136 hits                                                                                                                                                                                                                                                                                                                                           |

Para cada búsqueda, de acuerdo al potencial diseño de los estudios en las referencias obtenidas, se generaron archivos de texto (en formato .txt o .ris) para su gestión bibliográfica. Como resultado de las búsquedas se generaron archivos de texto con las referencias en cada una de las fuentes consultadas.

4. *Formulación de las recomendaciones.* Para ello se empleó la metodología de *Modified Nominal Group Technique* [3], que es un procedimiento altamente estructurado para alcanzar consenso entre un grupo de expertos en aquellos aspectos en los que hay una evidencia reducida y para los que la opinión de un experto es relevante. El proceso de consenso se llevó a cabo en 2 etapas y se estableció *a priori* como punto de corte para aceptar una recomendación un 80% de acuerdo en el grupo.

## Apéndice C

**Tabla C.1. Tipos y clasificación de las vacunas**

| Tipo de vacunas |                                    | Vacunas atenuadas (vivas)                                                                                                                                                                                | Vacunas inactivadas                                                                                                                                 |
|-----------------|------------------------------------|----------------------------------------------------------------------------------------------------------------------------------------------------------------------------------------------------------|-----------------------------------------------------------------------------------------------------------------------------------------------------|
| Víricas         | Enteras                            | <ul style="list-style-type: none"> <li>• Antipoliomielítico oral</li> <li>• Fiebre amarilla</li> <li>• Rotavirus</li> <li>• Sarampión-rubeola-parotiditis (triple vírica)</li> <li>• Varicela</li> </ul> | Antipoliomielítico inyectable<br><br>Encefalitis por garrapata<br><br>Encefalitis japonesa<br><br>Gripe (en desuso)<br><br>Hepatitis A<br><br>Rabia |
|                 | Subunidades                        |                                                                                                                                                                                                          | Gripe fraccionada o de subunidades<br><br>Hepatitis B<br><br>Virus del papiloma humano                                                              |
| Bacterianas     | Acelulares                         |                                                                                                                                                                                                          | Tos ferina acelular                                                                                                                                 |
|                 | Conjugadas polisacárido + proteína |                                                                                                                                                                                                          | Haemophilus influenzae tipo b<br><br>Meningococo C y AC W125Y<br><br>Neumococo 13                                                                   |
|                 | Enteras                            | <ul style="list-style-type: none"> <li>• Antituberculosa (BCG)</li> <li>• Tifoidea oral</li> </ul>                                                                                                       | Antitíficas parenterales<br><br>Cólera oral<br><br>Peste                                                                                            |
|                 | Polisacáridos capsulares           |                                                                                                                                                                                                          | Meningococo A+C y ACW135Y<br><br>Neumococo 23                                                                                                       |
|                 | Proteínas de superficie            |                                                                                                                                                                                                          | Meningococo B                                                                                                                                       |
|                 | Toxoides                           |                                                                                                                                                                                                          | Difteria<br><br>Tétanos                                                                                                                             |

## Apéndice D

**Tabla D.1. Listado de recomendaciones votadas consensuadas**

| Recomendación                                                                                                                                                                                                                                                                                                                                                                                                               | Grado de acuerdo (%) | Fase de consenso |
|-----------------------------------------------------------------------------------------------------------------------------------------------------------------------------------------------------------------------------------------------------------------------------------------------------------------------------------------------------------------------------------------------------------------------------|----------------------|------------------|
| R1. Las características del paciente candidato a Alemtuzumab deberían aproximarse a las siguientes: enfermedad activa clínica o radiológica y/o respuesta subóptima al tratamiento modificador del curso de la enfermedad y/o enfermedad con curso rápido y agresivo.                                                                                                                                                       | 82                   | SEGUNDA          |
| R2. Se recomienda adoptar medidas de seguridad adicionales a lo establecido en la ficha técnica en aquellos pacientes que van a iniciar tratamiento con Alemtuzumab y previamente han sido tratados con otros fármacos inmunosupresores.                                                                                                                                                                                    | 81                   | PRIMERA          |
| R3. Se recomienda abordar de manera temprana en el curso de la enfermedad la vacunación del paciente con esclerosis múltiple para asegurar una mayor respuesta.                                                                                                                                                                                                                                                             | 86                   | SEGUNDA          |
| R4. Se aconseja evaluar la necesidad de vacunación antes de iniciar tratamiento con Alemtuzumab. Para ello es necesario: (i) conocer el estado serológico del paciente frente a sarampión, varicela, hepatitis A y B; (ii) documentar los antecedentes de vacunación del paciente, con especial énfasis en gripe estacional, neumococo, hepatitis A y B, tétanos-difteria, varicela, sarampión y virus del papiloma humano. | 85                   | PRIMERA          |
| R5. Se aconseja evaluar la vacunación en pacientes que van a iniciar Alemtuzumab según las especificaciones de la Figura 3 (documento principal).                                                                                                                                                                                                                                                                           | 100                  | SEGUNDA          |
| R6. Se recomienda respetar los intervalos de seguridad entre la vacunación y el inicio de tratamiento con Alemtuzumab (Tabla 1, documento principal).                                                                                                                                                                                                                                                                       | 100                  | SEGUNDA          |
| R7. Antes de iniciar el tratamiento con Alemtuzumab, se recomienda el despistaje de infección tuberculosa latente mediante la prueba de la tuberculina y/o ensayos de liberación de gamma-interferón específico (IGRA), siguiendo los protocolos de cada centro hospitalario. Los pacientes en los que se documente una infección tuberculosa deben recibir tratamiento con isoniácida (300                                 | 90                   | PRIMERA          |



mg/día en ayunas, durante 6 meses), suplementada con vitamina B6. El tratamiento de la infección tuberculosa no debe retrasar el inicio de tratamiento con Alemtuzumab. Según las posibilidades, se recomienda retrasar 2-4 semanas para comprobar la tolerabilidad y ausencia de toxicidad de isoniácida.

|                                                                                                                                                                                                                                                                                                                                                                                                                                                                                  |     |         |
|----------------------------------------------------------------------------------------------------------------------------------------------------------------------------------------------------------------------------------------------------------------------------------------------------------------------------------------------------------------------------------------------------------------------------------------------------------------------------------|-----|---------|
| R8. Antes de iniciar el tratamiento con Alemtuzumab se recomienda el despistaje de otras infecciones que ayuden a tomar decisiones de cara a la vacunación adecuada o al riesgo de complicaciones (VHB, VHC, VIH, CMV, VVZ, VPH, ver sección de vacunación; Strongyloides en inmigrantes de ciertas áreas endémicas como Hispanoamérica y Norte de África).                                                                                                                      | 84  | PRIMERA |
| R9. Durante el tratamiento con Alemtuzumab se recomienda la prevención de la infección herpética mediante la administración de profilaxis oral con aciclovir desde la primera dosis de Alemtuzumab (200 mg/12 h durante 4-8 semanas). Como alternativa, puede también administrarse valaciclovir 500 mg/día una vez al día.                                                                                                                                                      | 100 | PRIMERA |
| R10. Durante el tratamiento con Alemtuzumab se recomienda la minimización del riesgo de infección por Listeria. Aunque no existe evidencia de calidad sobre la eficacia de la medida, se puede aconsejar evitar la ingesta de alimentos cárnicos crudos o poco cocidos y lácteos no pasteurizados (desde dos semanas antes del inicio del tratamiento y hasta como mínimo un mes después de la administración ó hasta la reconstitución inmunológica sistémica según los casos). | 100 | SEGUNDA |
| R11. Tras la administración de Alemtuzumab no se recomienda la utilización sistemática de medidas preventivas específicas de infecciones bacterianas, fúngicas o parasitarias. No obstante, ante síntomas sugestivos es necesario descartar infecciones graves sean de carácter oportunista o no.                                                                                                                                                                                | 90  | PRIMERA |
| R12. Antes de iniciar el tratamiento con Alemtuzumab, se recomienda proporcionar una hoja de información al paciente para la firma de consentimiento informado.                                                                                                                                                                                                                                                                                                                  | 100 | PRIMERA |
| R13. Antes de iniciar el tratamiento con Alemtuzumab, se recomienda documentar los tratamientos previos y concomitantes del paciente. Si el paciente no ha recibido previamente ningún TME o está en tratamiento activo con interferón beta o acetato de glatirámico antes de iniciar Alemtuzumab, no se establecerá por este motivo un                                                                                                                                          | 90  | PRIMERA |

periodo de ventana ni de “lavado” antes de iniciarlo. Si el paciente está en tratamiento activo con algún otro TME se deberán respetar los periodos de lavado establecidos en la Tabla 2 (documento principal).

|                                                                                                                                                                                                                                                                                                                                                                                                                                                                                                                                                                                                                                                                                                                                                                              |    |         |
|------------------------------------------------------------------------------------------------------------------------------------------------------------------------------------------------------------------------------------------------------------------------------------------------------------------------------------------------------------------------------------------------------------------------------------------------------------------------------------------------------------------------------------------------------------------------------------------------------------------------------------------------------------------------------------------------------------------------------------------------------------------------------|----|---------|
| R14. Antes de iniciar el tratamiento con Alemtuzumab, se recomienda la realización de un test de embarazo.                                                                                                                                                                                                                                                                                                                                                                                                                                                                                                                                                                                                                                                                   | 95 | PRIMERA |
| R15. Antes de iniciar el tratamiento con Alemtuzumab, se aconseja disponer de una radiografía de tórax reciente.                                                                                                                                                                                                                                                                                                                                                                                                                                                                                                                                                                                                                                                             | 86 | SEGUNDA |
| R16. La administración de Alemtuzumab puede realizarse mediante hospitalización interna y hospitalización ambulatoria u hospital de día. Estas opciones son válidas y la elección de una u otra dependerá de la infraestructura disponible en el hospital, acceso a camas hospitalarias, disponibilidad de hospital de día de mañana y tarde entre otros factores.                                                                                                                                                                                                                                                                                                                                                                                                           | 95 | PRIMERA |
| R17. Se recomienda realizar el siguiente tratamiento pre-Alemtuzumab para prevenir las RAP:<br><br>1º Antipirético oral o intravenoso: paracetamol 1 gr, pre-perfusión, cada uno de los días de perfusión (es aconsejable unos 120 minutos pre-Alemtuzumab). Dejar prescrito a demanda para el resto del día según necesidad del paciente.<br><br>2º Antihistamínico oral o intravenoso: dexclorfeniramina 5 mg, pre-perfusión, cada uno de los días de perfusión (es aconsejable unos 120 minutos pre-Alemtuzumab). Dejar prescrito a demanda para el resto del día según necesidad del paciente.<br><br>3º Metilprednisolona IV: 90 minutos pre-Alemtuzumab (Figura 4, documento principal).<br><br>4º Administrar protector gástrico: pantoprazol 40 mg vo cada 24 horas. | 80 | PRIMERA |
| R18. Se recomienda administrar Alemtuzumab en no menos de 4 horas ni más de 8 siguiendo la velocidad de perfusión propuesta en la Figura 4 (documento principal). Tras la perfusión del fármaco los pacientes deben permanecer en observación durante 2 horas sin retirar el acceso venoso periférico.                                                                                                                                                                                                                                                                                                                                                                                                                                                                       | 89 | PRIMERA |
| R19. Se recomienda realizar mediciones de frecuencia cardiaca, tensión arterial y temperatura cada hora durante la perfusión y durante las dos horas de observación tras la perfusión. Se pueden acompañar de inspecciones                                                                                                                                                                                                                                                                                                                                                                                                                                                                                                                                                   | 95 | PRIMERA |

dermatológicas para detectar la presencia de urticaria, erupciones y otras lesiones dermatológicas o vasculares menos frecuentes.

|                                                                                                                                                                                                                                                                                                                                                                                |     |                |
|--------------------------------------------------------------------------------------------------------------------------------------------------------------------------------------------------------------------------------------------------------------------------------------------------------------------------------------------------------------------------------|-----|----------------|
| R20. Se recomienda abordar el tratamiento de las RAP en función de su severidad siguiendo lo indicado en la Figura 4 (documento principal).                                                                                                                                                                                                                                    | 90  | PRIMERA        |
| R21. Se recomienda instruir al paciente sobre los síntomas que podría experimentar indicativos de las alteraciones inmunológicas que pueden aparecer a largo plazo siguiendo la lista de comprobación propuesta en la Figura 5 (documento principal).                                                                                                                          | 95  | PRIMERA        |
| R22. Se recomienda realizar una citología ginecológica con determinación del VPH anualmente en mujeres tratadas con Alemtuzumab.                                                                                                                                                                                                                                               | 85  | SEGUNDA<br>[4] |
| R23. Deben transcurrir 12 meses entre el primer y segundo curso de Alemtuzumab. Se recomienda alargar este periodo en el caso de que el paciente no haya alcanzado una reconstitución inmunológica sistémica (recuento LT CD4+ >200 cel/ $\mu$ L) o porque exista alguna complicación activa derivada del primer curso (por ejemplo, alguna alteración tiroidea).              | 89  | PRIMERA        |
| R24. En el segundo curso y posteriores de Alemtuzumab, se recomienda la realización de los mismos procedimientos llevados a cabo durante los tres periodos establecidos para el primer curso.                                                                                                                                                                                  | 95  | PRIMERA        |
| R25. Los convivientes y personas del entorno más cercano de los pacientes en tratamiento con inmunosupresores como Alemtuzumab pueden ser una fuente potencial de contagio. En pacientes que tengan una serología negativa y ya hayan iniciado tratamiento con Alemtuzumab se aconseja evaluar la vacunación frente a varicela y/o sarampión en los convivientes susceptibles. | 91  | SEGUNDA        |
| R26. Solo debe administrarse Alemtuzumab durante el embarazo si los posibles beneficios justifican los riesgos potenciales para el feto.                                                                                                                                                                                                                                       | 80  | SEGUNDA<br>[4] |
| R27. Se recomienda que en las mujeres en edad fértil en las que se administre Alemtuzumab tomen medidas contraceptivas adecuadas durante los 4 meses siguientes a la perfusión.                                                                                                                                                                                                | 100 | PRIMERA        |

|                                                                                                                                                                                             |    |         |
|---------------------------------------------------------------------------------------------------------------------------------------------------------------------------------------------|----|---------|
| R28. Se recomienda interrumpir la lactancia materna durante cada curso de tratamiento con Alemtuzumab y durante los 4 meses posteriores a la última perfusión de cada curso de tratamiento. | 90 | PRIMERA |
|---------------------------------------------------------------------------------------------------------------------------------------------------------------------------------------------|----|---------|

|                                                                                                                                                                                                      |    |                |
|------------------------------------------------------------------------------------------------------------------------------------------------------------------------------------------------------|----|----------------|
| R29. Se recomienda demorar cualquier tipo de intervención quirúrgica si la situación clínica motivo de la cirugía lo permite, hasta que se considere restablecida la inmunocompetencia del paciente. | 80 | SEGUNDA<br>[4] |
|------------------------------------------------------------------------------------------------------------------------------------------------------------------------------------------------------|----|----------------|

---

TME: Tratamiento modificador de la enfermedad. RAP: Reacciones asociadas a la perfusión. VHB: Virus de la hepatitis B. VHC: Virus de la hepatitis C. VIH: Virus de inmunodeficiencia humana. VPH: Virus del papiloma humano. VVZ: Virus varicela-zóster.

## Apéndice E

**Tabla E.1. Listado de recomendaciones votadas no consensuadas**

| Recomendación                                                                                                                                                                                                                                                                                                                                                                                                                                                                                                                                                                                                                                                                                                                      | Grado de acuerdo (%) | Fase de consenso |
|------------------------------------------------------------------------------------------------------------------------------------------------------------------------------------------------------------------------------------------------------------------------------------------------------------------------------------------------------------------------------------------------------------------------------------------------------------------------------------------------------------------------------------------------------------------------------------------------------------------------------------------------------------------------------------------------------------------------------------|----------------------|------------------|
| Se recomienda la vacunación antigripal estacional en los convivientes de pacientes que reciben tratamiento con Alemtuzumab.                                                                                                                                                                                                                                                                                                                                                                                                                                                                                                                                                                                                        | 27                   | SEGUNDA [5]      |
| <p>Se aconseja valorar iniciar antibiótico profiláctico en pacientes que el clínico considere de riesgo para desarrollar infecciones oportunistas por inmunosupresión previa adoptando las siguientes medidas adicionales:</p> <ul style="list-style-type: none"> <li>- administrar profilaxis frente a la neumonía por <i>Pneumocystis jiroveci</i>, mediante la administración de cotrimoxazol 160/800 mg, tres veces por semana, hasta que la cifra de CD4 sea &gt;200 células/<math>\mu</math>L.</li> <li>- mantener el tratamiento con aciclovir oral hasta que la cifra de CD4 sea &gt;200 células/<math>\mu</math>L en aquellos pacientes con antecedentes de herpes zoster de repetición (dos o más episodios).</li> </ul> | 57                   | SEGUNDA [5]      |
| Antes de iniciar el tratamiento con Alemtuzumab, se recomienda el despistaje de enfermedades autoinmunes latentes mediante la realización de análisis de anticuerpos anti-tiroglobulina, anti-peroxidasa tiroidea y anti-receptor de la hormona estimulante tiroidea (TSH).                                                                                                                                                                                                                                                                                                                                                                                                                                                        | 62                   | SEGUNDA [5]      |

## Referencias de los apéndices

- 1 Cohen JA, Coles AJ, Arnold DL, Confavreux C, Fox EJ, Hartung H-P, et al. Alemtuzumab versus interferon beta 1a as first-line treatment for patients with relapsing-remitting multiple sclerosis: a randomised controlled phase 3 trial. *Lancet Lond Engl* 2012; 380: 1819-28.
- 2 Coles AJ, Twyman CL, Arnold DL, Cohen JA, Confavreux C, Fox EJ, et al. Alemtuzumab for patients with relapsing multiple sclerosis after disease-modifying therapy: a randomised controlled phase 3 trial. *Lancet Lond Engl* 2012; 380: 1829-39.
- 3 Murphy MK, Black NA, Lamping DL, McKee CM, Sanderson CF, Askham J, et al. Consensus development methods, and their use in clinical guideline development. *Health Technol Assess Winch Engl* 1998; 2: i-iv, 1-88.
- 4 McEwan L, Caon C, Chieffe C, Mayer L, Saldana-King T, Miller CE. Best Practices in Alemtuzumab Administration: Practical Recommendations for Infusion in Patients With Multiple Sclerosis. *J Infus Nurs Off Publ Infus Nurses Soc* 2016; 39: 93-104.
- 5 Dörr J, Baum K. Alemtuzumab in the treatment of multiple sclerosis: patient selection and special considerations. *Drug Des Devel Ther* 2016; 10: 3379–86.
